# Supplementary material for: SINE Insertion May Act as a Repressor to Affect the Expression of Pig LEPROT and Growth Traits
Source: MDPI journal article supplement (doi:10.3390/genes13081422), 2022-08-10
Supplement: s1 [file s1]

**Table S1 Primers used for identification of RIPs, expression and vector construction**

| Primer name                                             | Primer sequence<br>(5'-3')                                             | Size      | Annealing<br>temperature | Purpose                |
|---------------------------------------------------------|------------------------------------------------------------------------|-----------|--------------------------|------------------------|
| <i>LEPROT</i> -SINE- RIP                                | F: GGGGTACCCGCACCTTGGATCCCACA<br>R: CGGCTAGCTTCCCTGCATCTACCGGACA       | 460bp     | 60°C                     | RIPs                   |
| <i>LEPR</i> -SINE- RIP1                                 | F: CTGTTTCAGTCCCTAGTGCTT<br>R: TCTTATGTAGATGTGTCACGG                   | 865bp     | 55°C                     | identification         |
| <i>LEPR</i> -SINE- RIP2                                 | F: AAAGTGAAAGTTTATAGCCAACC<br>R: GGCATCCTTGTCTTGTCT                    | 673bp     | 55°C                     |                        |
| <i>GAPDH</i>                                            | F: GGACTCATGACCACGGTCCAT<br>R: TCAGATCCACAACCGACACGT                   | 220bp     | 58°C                     | Expression             |
| <i>LEPROT</i>                                           | F: AGCTCTTGTGGCTTTATCCTT<br>R: CCACACGAGCAAGAATAACGG                   | 260bp     | 58°C                     |                        |
| <i>LEPROT</i> <sup>SINE+/-</sup> -Luc <sup>+</sup> (EN) | F: GgggtaccccCTACCTTTAGCAAAGAGCGTT<br>R: CggctagccgCCTGCATCTACCGGACACT | 878/602bp | 60°C                     | Vector<br>construction |

**Table S2 Number and origin of pig breeds for RIPs identification and distribution**

| Breed             | Number | Province/country of origin        |
|-------------------|--------|-----------------------------------|
| Duroc             | 24     |                                   |
| Landrace          | 24     | Anhui/China                       |
| Large white       | 450    |                                   |
| Sujiang           | 24     | Jiangsu/China                     |
| Jiangquhai        | 24     | Jiangsu/China                     |
| Jinhua            | 24     | Zhejiang/China                    |
| Rongchang         | 24     | Chongqing/China                   |
| Erhualian         | 24     | Jiangsu/China                     |
| Bama              | 24     | Guangxi/China                     |
| Wuzhishan         | 24     | Hainan/China                      |
| Diannan small-ear | 6      | Yunnan/China                      |
| Tibetan           | 6      | Sichuan/China                     |
| Meishan           | 6      | Jiangsu/China                     |
| Fengjing          | 6      | Jiangsu/China                     |
| Wild boars        | 12     | Fujian/ Heilongjiang/Anhui /China |

**Table S3 Predicted structural variations of the porcine *LEPTIN*、*LEPROT* and *LEPR* genes using Clustal X and RepeatMasker**

| <i>LEPTIN</i> | <i>LEPROT</i> | <i>LEPR</i> | Total |
|---------------|---------------|-------------|-------|
|---------------|---------------|-------------|-------|

|          |        |        |        |        |
|----------|--------|--------|--------|--------|
| SVs      | 8      | 10     | 36     | 54     |
| SINE     | 3      | 5      | 15     | 23     |
| LINE     | 0      | 1      | 4      | 5      |
| LTR      | 0      | 0      | 4      | 4      |
| RIPs/SVs | 37.50% | 60.00% | 63.89% | 59.26% |

Note: the sequences of structural variation in this experiment were greater than or equal to 50 bp.
